# Supplementary material for: Significant improvement of cardiac outflow tract septation defects in a DiGeorge syndrome model after minoxidil treatment
Source: PubMed Central journal article supplement — Biochem Biophys Res Commun. 2024 Aug 6;720:None. doi: 10.1016/j.bbrc.2024.150104 (PMC11166380; doi:10.1016/j.bbrc.2024.150104), 2024-08-06
Supplement: mmc4.pdf [file mmc4.pdf]

### **Supplementary Figure 1**

HOMER output of 318 candidate regulatory elements mapped to the 21 up regulated genes related to extra cellular matrix, using the mouse genome as background.

| Rank | Motif                                                                              | Name                                                          | P-value | log P-value | q-value (Benjamini) | # Target Sequences with Motif | % of Targets Sequences with Motif | # Background Sequences with Motif | % of Background Sequences with Motif | Motif File                          | SVG                 |
|------|------------------------------------------------------------------------------------|---------------------------------------------------------------|---------|-------------|---------------------|-------------------------------|-----------------------------------|-----------------------------------|--------------------------------------|-------------------------------------|---------------------|
| 1    |     | Fra2(bZIP)/Striatum-Fra2-ChIP-Seq(GSE43429)/Homer             | 1e-6    | -1.421e+01  | 0.0003              | 40.0                          | 12.58%                            | 2646.9                            | 5.38%                                | <a href="#">motif file (matrix)</a> | <a href="#">svg</a> |
| 2    |    | BATF(bZIP)/Th17-BATF-ChIP-Seq(GSE39756)/Homer                 | 1e-5    | -1.364e+01  | 0.0003              | 50.0                          | 15.72%                            | 3779.0                            | 7.68%                                | <a href="#">motif file (matrix)</a> | <a href="#">svg</a> |
| 3    |    | AP-1(bZIP)/ThioMac-PU.1-ChIP-Seq(GSE21512)/Homer              | 1e-5    | -1.305e+01  | 0.0003              | 54.0                          | 16.98%                            | 4309.4                            | 8.76%                                | <a href="#">motif file (matrix)</a> | <a href="#">svg</a> |
| 4    |    | NF1-halbsite(CTF)/LNCaP-NF1-ChIP-Seq(Unpublished)/Homer       | 1e-5    | -1.234e+01  | 0.0005              | 117.0                         | 36.79%                            | 12483.8                           | 25.37%                               | <a href="#">motif file (matrix)</a> | <a href="#">svg</a> |
| 5    |    | Atoh1(bHLH)/Cerebellum-Atoh1-ChIP-Seq(GSE22111)/Homer         | 1e-5    | -1.220e+01  | 0.0005              | 83.0                          | 26.10%                            | 7984.4                            | 16.22%                               | <a href="#">motif file (matrix)</a> | <a href="#">svg</a> |
| 6    |    | NF1(CTF)/LNCAP-NF1-ChIP-Seq(Unpublished)/Homer                | 1e-5    | -1.197e+01  | 0.0005              | 36.0                          | 11.32%                            | 2482.7                            | 5.04%                                | <a href="#">motif file (matrix)</a> | <a href="#">svg</a> |
| 7    |    | Fra1(bZIP)/BT549-Fra1-ChIP-Seq(GSE46166)/Homer                | 1e-5    | -1.174e+01  | 0.0005              | 41.0                          | 12.89%                            | 3041.2                            | 6.18%                                | <a href="#">motif file (matrix)</a> | <a href="#">svg</a> |
| 8    |    | Atf3(bZIP)/GBM-ATF3-ChIP-Seq(GSE33912)/Homer                  | 1e-4    | -1.148e+01  | 0.0006              | 47.0                          | 14.78%                            | 3742.3                            | 7.60%                                | <a href="#">motif file (matrix)</a> | <a href="#">svg</a> |
| 9    |    | Fos(bZIP)/TSC-Fos-ChIP-Seq(GSE110950)/Homer                   | 1e-4    | -1.126e+01  | 0.0006              | 42.0                          | 13.21%                            | 3215.0                            | 6.53%                                | <a href="#">motif file (matrix)</a> | <a href="#">svg</a> |
| 10   |    | JunB(bZIP)/DendriticCells-Junb-ChIP-Seq(GSE36099)/Homer       | 1e-4    | -1.126e+01  | 0.0006              | 41.0                          | 12.89%                            | 3104.8                            | 6.31%                                | <a href="#">motif file (matrix)</a> | <a href="#">svg</a> |
| 11   |    | TCF4(bHLH)/SHSY5Y-TCF4-ChIP-Seq(GSE96915)/Homer               | 1e-4    | -1.116e+01  | 0.0006              | 106.0                         | 33.33%                            | 11268.3                           | 22.90%                               | <a href="#">motif file (matrix)</a> | <a href="#">svg</a> |
| 12   |    | NeuroD1(bHLH)/Islet-NeuroD1-ChIP-Seq(GSE30298)/Homer          | 1e-4    | -1.076e+01  | 0.0008              | 64.0                          | 20.13%                            | 5881.8                            | 11.95%                               | <a href="#">motif file (matrix)</a> | <a href="#">svg</a> |
| 13   |    | BHLHA15(bHLH)/NIH3T3-BHLHB8_HA-ChIP-Seq(GSE119782)/Homer      | 1e-4    | -1.019e+01  | 0.0013              | 97.0                          | 30.50%                            | 10293.6                           | 20.92%                               | <a href="#">motif file (matrix)</a> | <a href="#">svg</a> |
| 14   |    | Tcf21(bHLH)/ArterySmoothMuscle-Tcf21-ChIP-Seq(GSE61369)/Homer | 1e-4    | -9.414e+00  | 0.0026              | 70.0                          | 22.01%                            | 6916.2                            | 14.05%                               | <a href="#">motif file (matrix)</a> | <a href="#">svg</a> |
| 15   |    | NeuroG2(bHLH)/Fibroblast-NeuroG2-ChIP-Seq(GSE75910)/Homer     | 1e-4    | -9.246e+00  | 0.0028              | 102.0                         | 32.08%                            | 11228.3                           | 22.82%                               | <a href="#">motif file (matrix)</a> | <a href="#">svg</a> |
| 16   |   | Ap4(bHLH)/AML-Tfap4-ChIP-Seq(GSE45738)/Homer                  | 1e-3    | -8.186e+00  | 0.0077              | 84.0                          | 26.42%                            | 9067.4                            | 18.42%                               | <a href="#">motif file (matrix)</a> | <a href="#">svg</a> |
| 17   |  | Olig2(bHLH)/Neuron-Olig2-ChIP-Seq(GSE30882)/Homer             | 1e-3    | -7.966e+00  | 0.0090              | 118.0                         | 37.11%                            | 13868.6                           | 28.18%                               | <a href="#">motif file (matrix)</a> | <a href="#">svg</a> |
| 18   |  | Sox2(HMG)/mES-Sox2-ChIP-Seq(GSE11431)/Homer                   | 1e-3    | -7.418e+00  | 0.0147              | 55.0                          | 17.30%                            | 5453.7                            | 11.08%                               | <a href="#">motif file (matrix)</a> | <a href="#">svg</a> |
| 19   |  | Lhx3(Homeobox)/Neuron-Lhx3-ChIP-Seq(GSE31456)/Homer           | 1e-3    | -7.322e+00  | 0.0153              | 92.0                          | 28.93%                            | 10414.3                           | 21.16%                               | <a href="#">motif file (matrix)</a> | <a href="#">svg</a> |
| 20   |  | Nanog(Homeobox)/mES-Nanog-ChIP-Seq(GSE11724)/Homer            | 1e-3    | -7.259e+00  | 0.0155              | 204.0                         | 64.15%                            | 27146.5                           | 55.16%                               | <a href="#">motif file (matrix)</a> | <a href="#">svg</a> |
