# Supplementary material for: Significant improvement of cardiac outflow tract septation defects in a DiGeorge syndrome model after minoxidil treatment
Source: PubMed Central journal article supplement — Biochem Biophys Res Commun. 2024 Aug 6;720:None. doi: 10.1016/j.bbrc.2024.150104 (PMC11166380; doi:10.1016/j.bbrc.2024.150104), 2024-08-06

## **Supplementary Figure 2**

Minoxidil treatment does not affect normal development of the OFT in WT individuals.

a-c) Hematoxylin & eosin-stained sections of hearts from fetuses WT fetuses treated with Minoxidil.

There are no morphological defects.

Sections indicated with the same letter are from the same heart.

IVS: Interventricular septum; LV: Left ventricle; RV: Right ventricle; Ao: Aorta; P: Pulmonary trunk;

Scale bare: 100 $\mu$ m.

***Tbx1*<sup>+/+</sup> + Minoxidil**

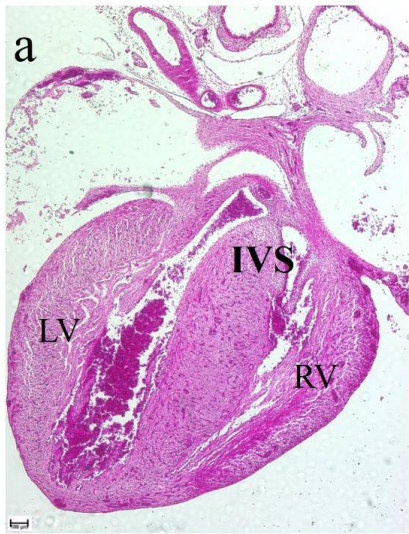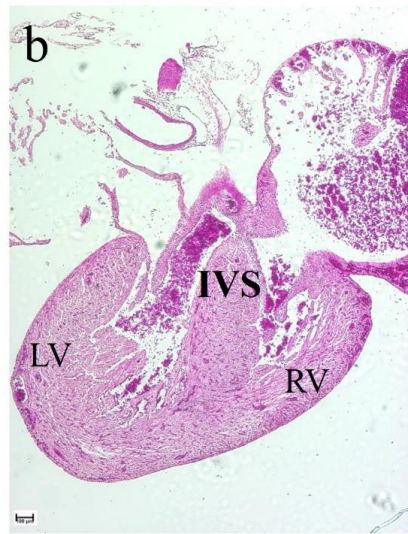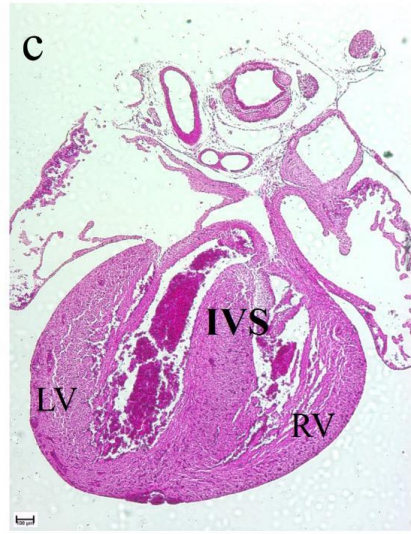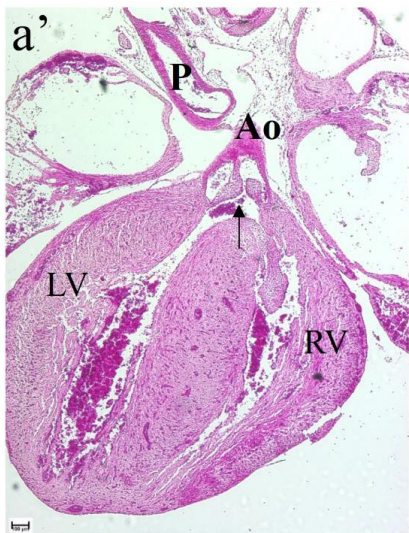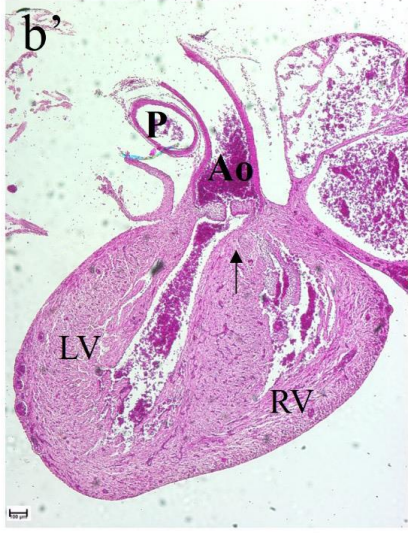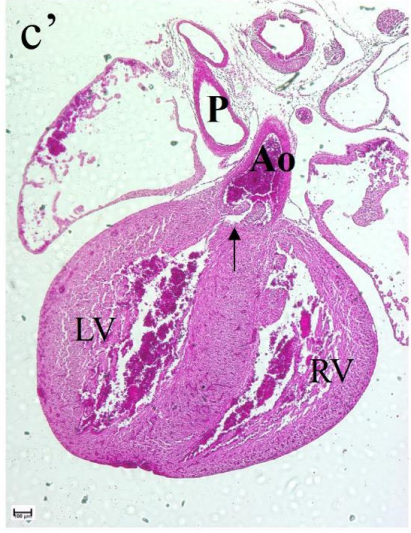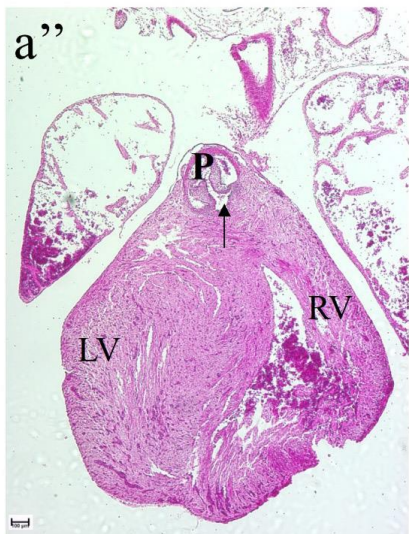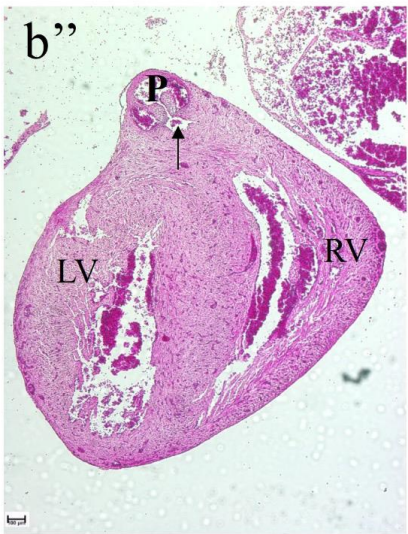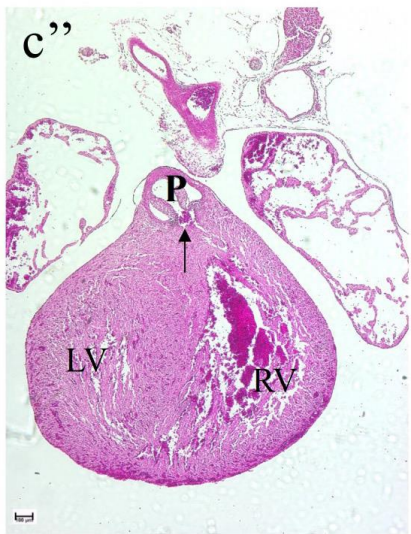

Supplement: mmc5.pdf [file mmc5.pdf]
